# Supplementary material
Source: PubMed Central journal article supplement (PMC5607204)
Supplement: mmc1.pdf [file mmc1.pdf]

**Biophysical Journal, Volume 113**

**Supplemental Information**

**Effects of HIV-1 gp41-Derived Virucidal Peptides on Virus-like Lipid  
Membranes**

**Pablo Carravilla, Antonio Cruz, Itziar Martin-Ugarte, Itziar R. Oar-Arteta, Johanna Torralba, Beatriz Apellaniz, Jesús Pérez-Gil, José Requejo-Isidro, Nerea Huarte, and José L. Nieva**

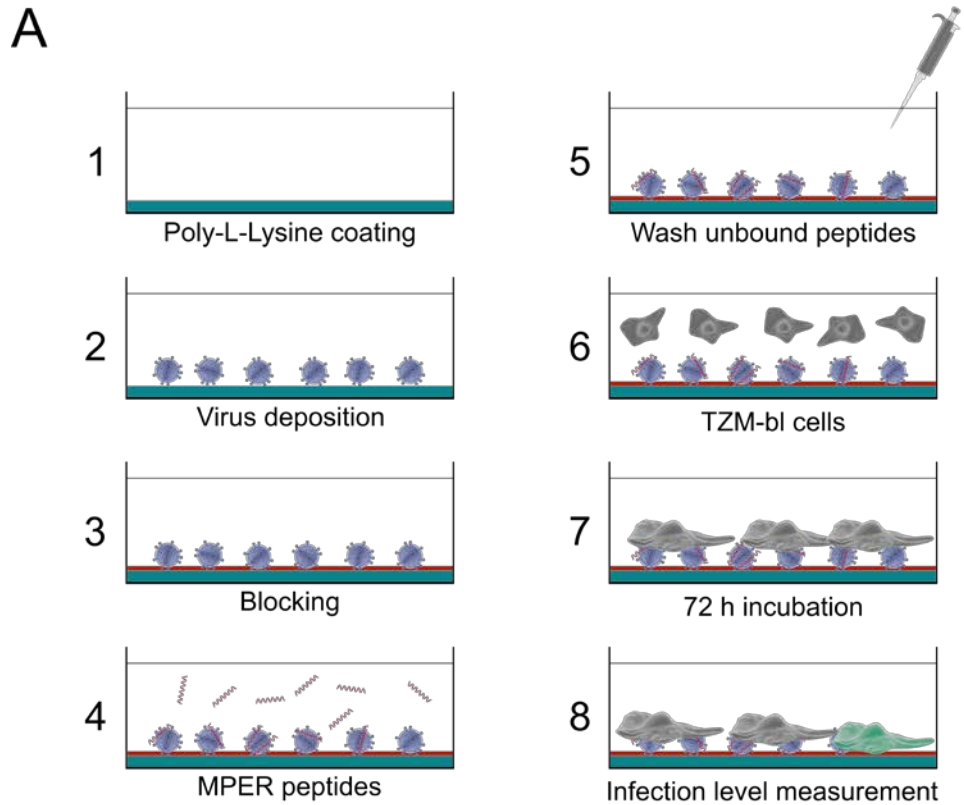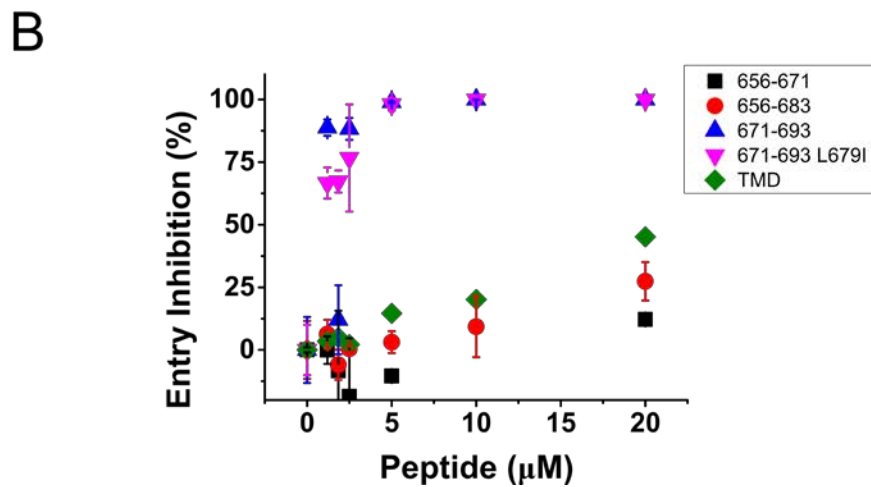

**Supporting Figure 1. Cell infection inhibition exerted by MPER-TMD-based peptides.** **A) Experimental set-up.** To measure cell entry inhibition, HIV-1 pseudoviruses were first pre-attached to lysine-coated plates (1-3). The immobilized particles were subsequently treated with increasing concentrations of the peptides (4). After washing (5), reporter TZM-bl cells were layered on top (6-7), and infectivity inferred from the number of total cells expressing GFP (8). **B) Control for sequence specificity.** In these assays VSV-G pseudoviruses were used as a control for cell entry mediated by a different viral fusion glycoprotein. Conditions otherwise as in Fig. 1B.

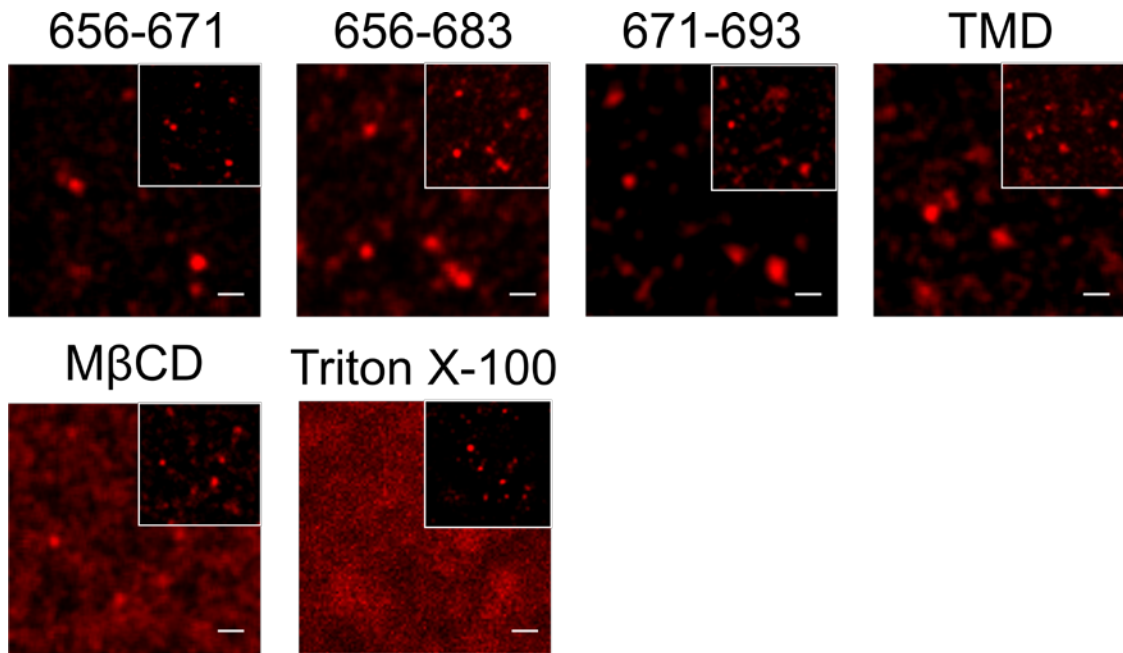

**Supporting Figure 2. Fluorescence imaging of membrane lipids on solid supports containing immobilized viral particles.** For fluorescent labeling of membrane lipids, transfected 293T cells were incubated with DiD probe prior to isolation of the pseudoviruses as described in: Padilla-Parra et al. (2013) PLOS ONE, e71002. Particles were attached to a poly-Lys-coated surface for imaging. Micrographs on top illustrate the effect of the different peptides. Images were taken after 15 min incubation with peptides applied at 20  $\mu$ M, a concentration that results in full infection inhibition in the case of MPER(671-693) (see Fig. 1B). Micrographs below display samples treated with Methyl- $\beta$ -cyclodextrin (10 mM) or Triton X-100 (0.5%). Insets display micrographs of the samples prior to treatment with the different compounds. Scale bar is 1  $\mu$ m.
